# Supplementary material for: Bevacizumab specifically decreases elevated levels of circulating KIT+CD11b+ cells and IL-10 in metastatic breast cancer patients
Source: PubMed Central journal article supplement (PMC4905463; doi:10.18632/oncotarget.7097), 2016-01-31
Supplement: oncotarget-07-11137-s001.pdf [file oncotarget-07-11137-s001.pdf]

## Bevacizumab specifically decreases elevated levels of circulating $\text{KIT}^+\text{CD11b}^+$ cells and IL-10 in metastatic breast cancer patients

### Supplementary Materials

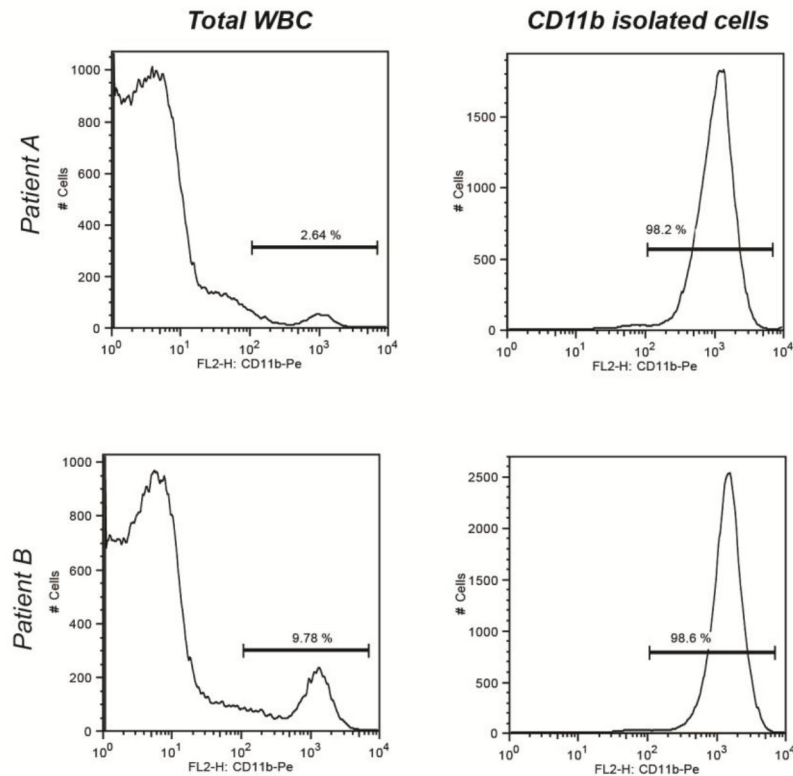

**Supplementary Figure S1: High purity of MACS-isolated  $\text{CD11b}^+$  cells.** Flow Cytometry analysis of total white blood cells isolated from two cancer patients and cells isolated thereof using MACS  $\text{CD11b}$  beads. Cells were stained with anti- $\text{CD11b-PE}$  antibodies and analyzed by flow cytometry.

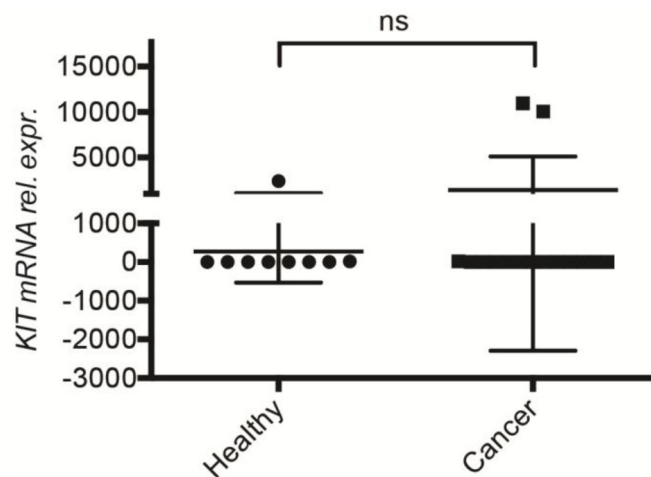

**Supplementary Figure S2: Altered  $\text{KIT}$  protein expression in healthy subjects vs. cancer patients is not reflected at mRNA level.** Quantification of  $\text{KIT}$  mRNA expression in  $\text{CD11b}^+$  cells at mRNA level using real time qPCR. Data are represented as mean  $\pm$  SD.

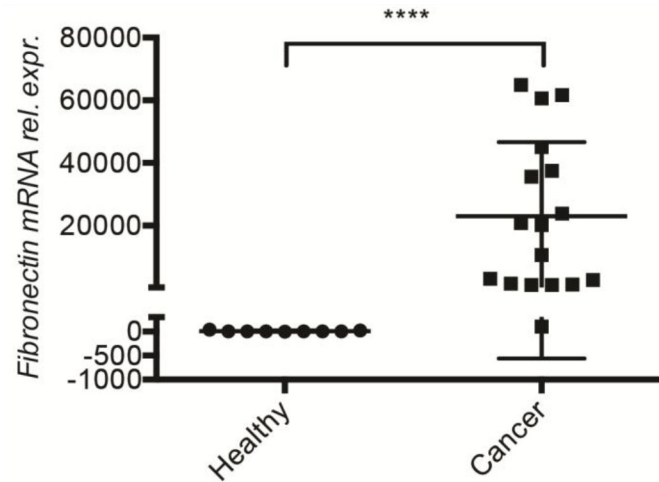

**Supplementary Figure S3: Cancer patients express higher levels of fibronectin mRNA compared to healthy subjects.** Quantification of fibronectin mRNA expression in CD11b<sup>+</sup> cells from healthy donors vs. breast cancer patients using real time qPCR. Data are represented as mean  $\pm$  SD.

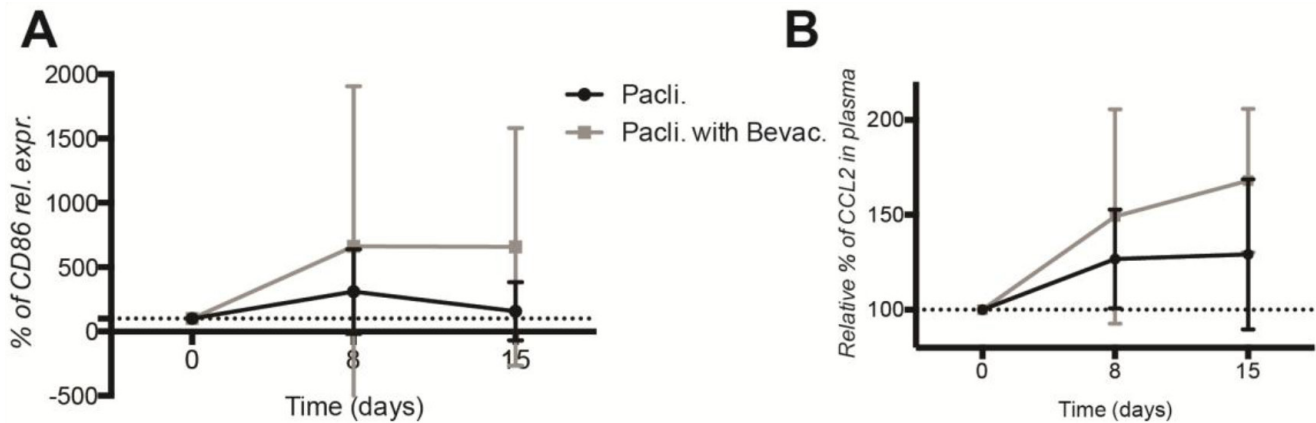

**Supplementary Figure S4: M1 polarization markers tend to increase upon treatment with bevacizumab.** (A) Quantification of the CD86 mRNA expression level in CD11b<sup>+</sup> cells from patients during therapy with paclitaxel  $\pm$  bevacizumab using real time qPCR. (B) Quantification of CCL2 cytokine in the plasma of cancer patients during therapy with paclitaxel  $\pm$  bevacizumab using ELISA. All data are represented as mean  $\pm$  SD.

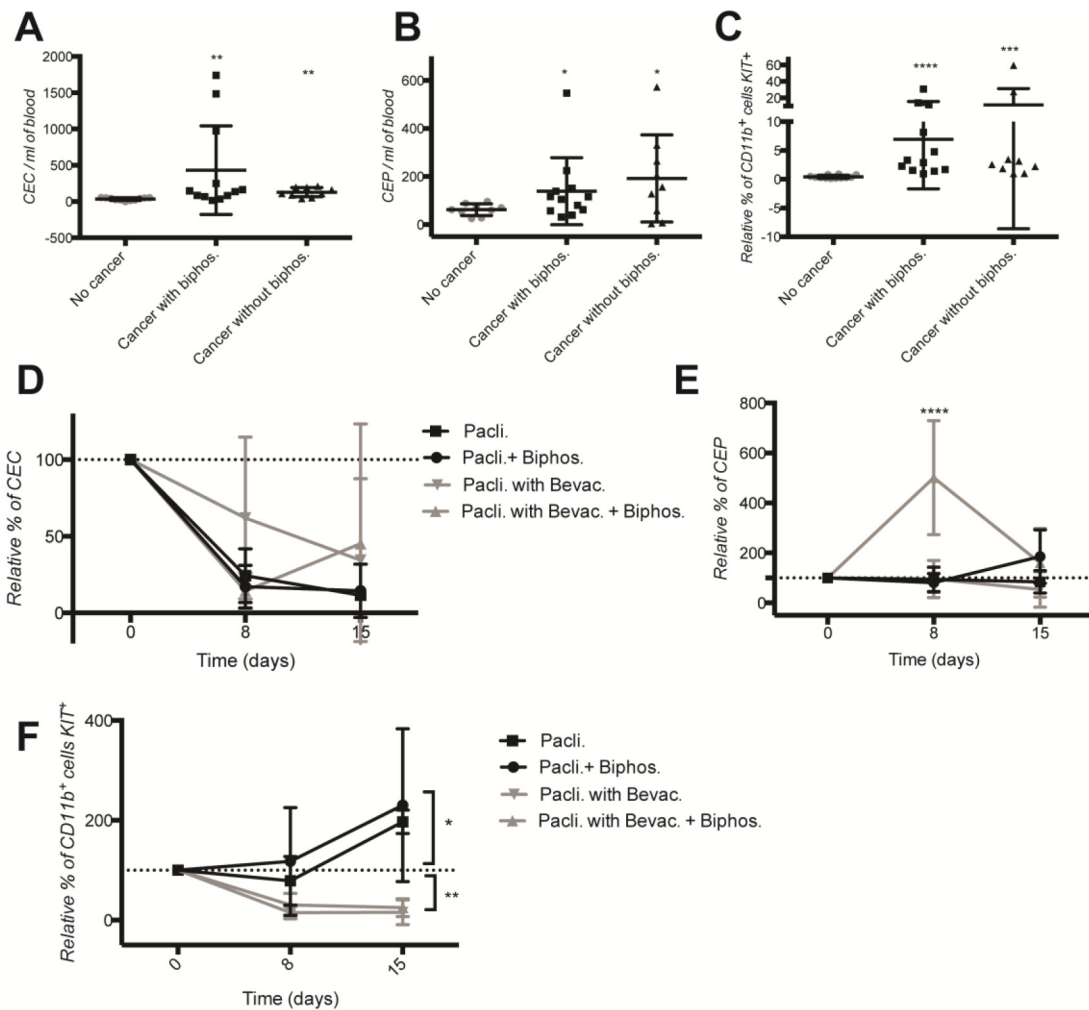

**Supplementary Figure S5: Bisphosphonates impact on circulating cells.** (A) Quantification of CEC and of (B) CEP in the blood of healthy donors and mBC patients ± bisphosphonate treatment as indicated. (C) Quantification of CD11b<sup>+</sup> cells expressing KIT in the blood of healthy donors and mBC patients ± bisphosphonate. (D) Relative level CEC and (E) CEP under both chemotherapy treatments ± bisphosphonate. (F) Relative levels CD11b<sup>+</sup> cells expressing KIT under both chemotherapy treatments ± bisphosphonate. Cell quantifications were performed by flow cytometry. All data are represented as mean ± SD.

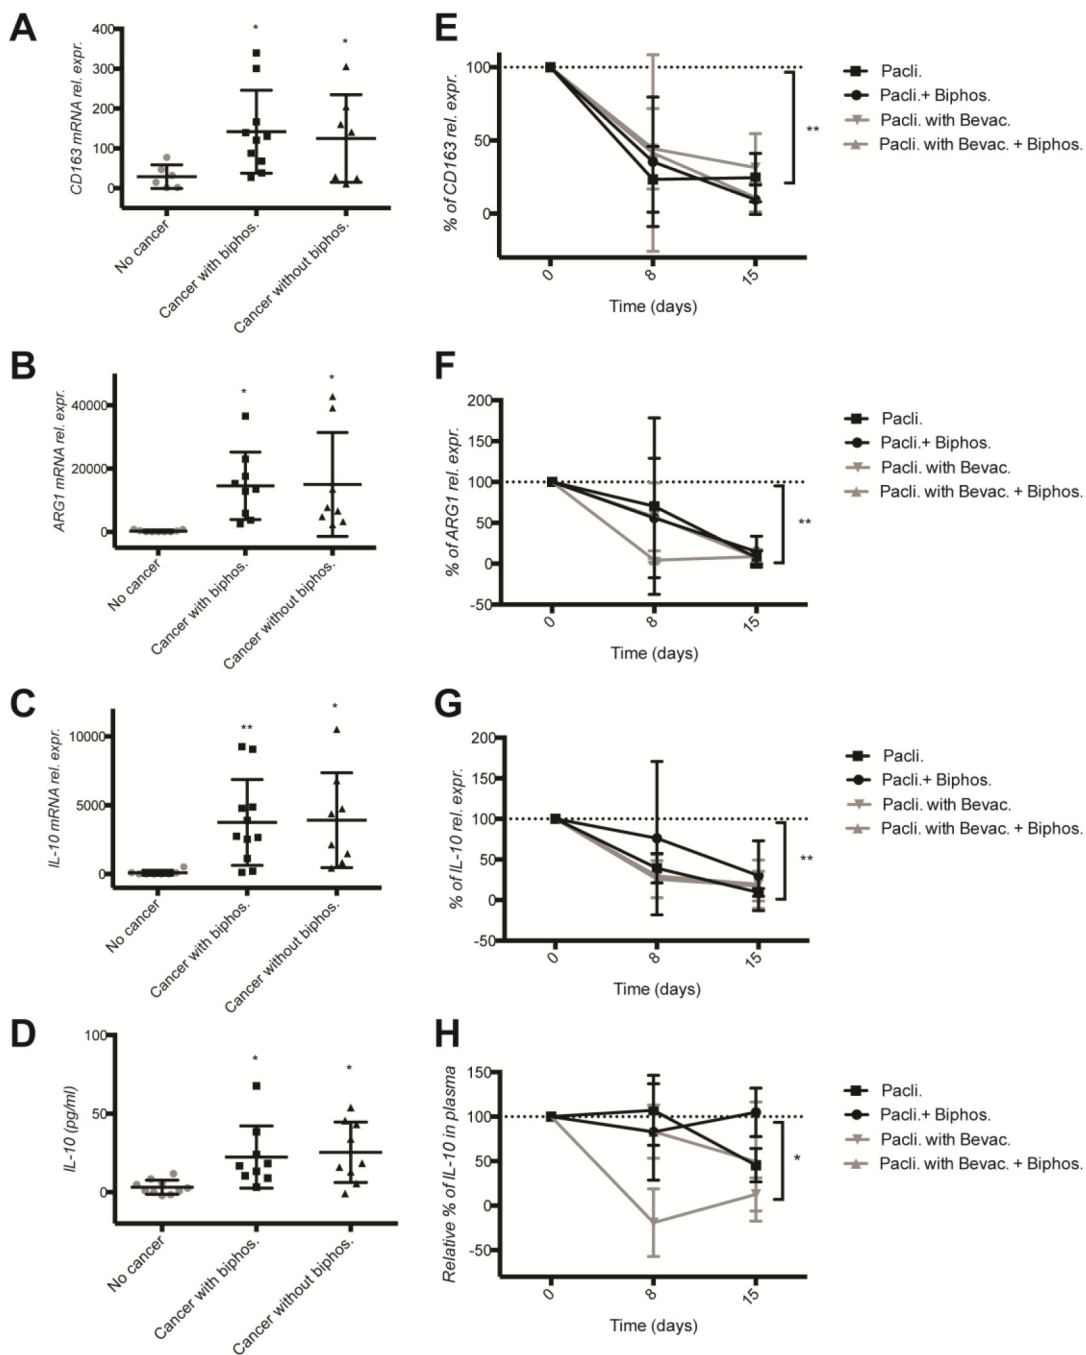

**Supplementary Figure S6: Bisphosphonates impact on M2 markers.** (A) Quantification of CD163, (B) ARG1 and (C) IL-10 mRNA expression level in CD11b+ cells of cancer patients ± bisphosphonate treatment. (D) Quantification of IL-10 in the plasma of cancer patients ± bisphosphonate treatment. (E) Relative changes in CD163, (F) ARG1 and (G) IL-10 mRNA expression level in CD11b+ cells of cancer patients under both chemotherapy treatments ± bisphosphonate. (H) Relative changes of IL-10 level in the plasma of cancer patients under both chemotherapy treatments ± bisphosphonate. mRNA quantifications were performed by real time qPCR and cytokines were measured by ELISA. All data are represented as mean ± SD.

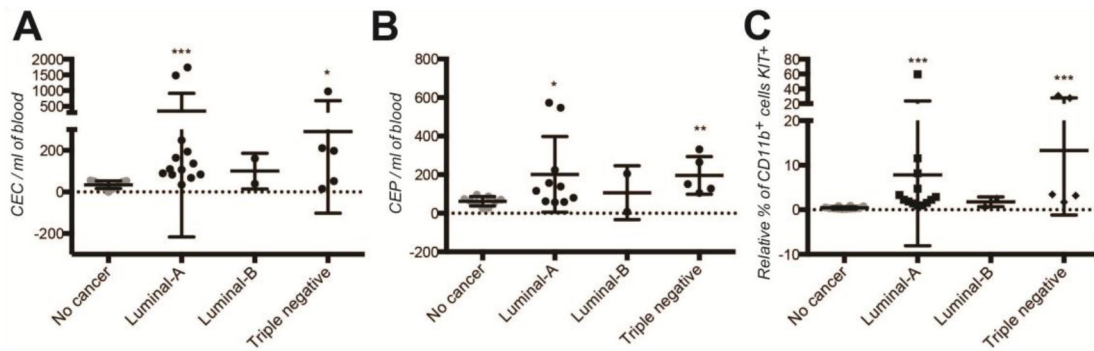

**Supplementary Figure S7: Impact of breast cancer types on circulating cells.** (A) Quantification of CEC in the blood of patient based of tumor type. (B) Quantification of CEP in the blood of patient based on tumor type. (C) Quantification CD11b<sup>+</sup> monocytes expressing KIT based on tumor type. Cell quantifications were performed by flow cytometry. All data are represented as mean  $\pm$  SD.

**Supplementary Table S1: List of significantly differentially expressed genes in patients vs healthy subjects determined by RNASeq**

**Supplementary Table S2: List of significantly up-regulated genes analysed by gene ontology**

**Supplementary Table S3: List of significantly down-regulated genes analysed by gene ontology**
